# Supplementary material for: The transcription factor USF1 promotes glioma cell invasion and migration by activating lncRNA HAS2-AS1
Source: PubMed Central journal article supplement (PMC7442972; doi:10.1042/bsr20200487), 2020-08-21
Supplement: BSR-2020-0487_supp.pdf [file BSR-2020-0487_supp.pdf]

A

| gene1    | gene2  | Cor   | pvalue   |
|----------|--------|-------|----------|
| HAS2-AS1 | MAX    | 0.223 | 2.64E-09 |
| HAS2-AS1 | SPI1   | 0.399 | 5.33E-28 |
| HAS2-AS1 | RAD21  | 0.334 | 1.33E-19 |
| HAS2-AS1 | MED1   | 0.201 | 9.16E-08 |
| HAS2-AS1 | TAF1   | 0.128 | 0.00069  |
| HAS2-AS1 | MXI1   | 0.119 | 0.001572 |
| HAS2-AS1 | SIN3A  | 0.184 | 9.41E-07 |
| HAS2-AS1 | EP300  | 0.07  | 0.063817 |
| HAS2-AS1 | TCF12  | 0.176 | 3.01E-06 |
| HAS2-AS1 | POLR2A | 0.017 | 0.648564 |
| HAS2-AS1 | CTCF   | 0.165 | 1.22E-05 |
| HAS2-AS1 | SMC3   | 0.132 | 0.000467 |
| HAS2-AS1 | USF1   | 0.259 | 3.47E-12 |
| HAS2-AS1 | GATA3  | 0.206 | 3.96E-08 |

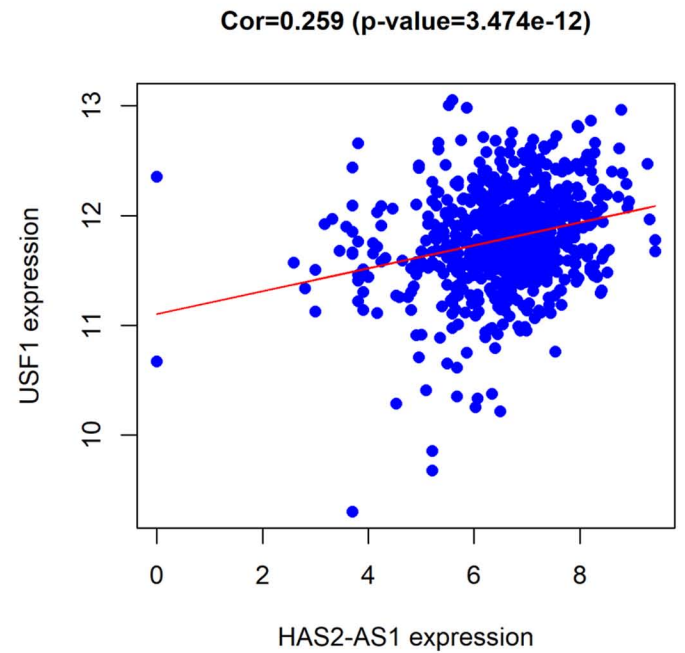

B

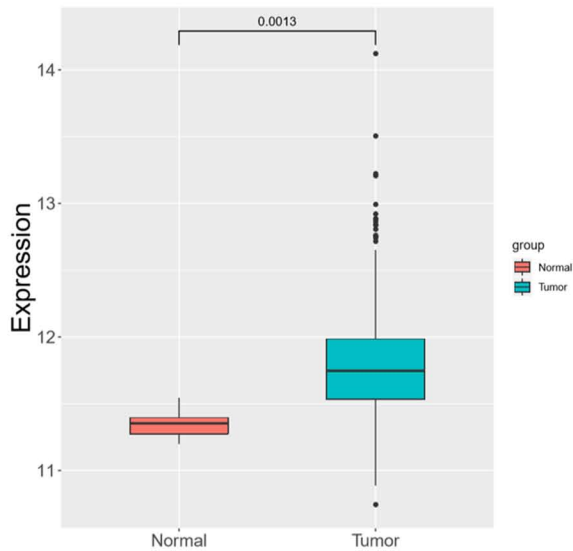

**Supplement Figure 1 USF1 is highly expressed in glioma and is positively correlated with the expression of HAS2-AS1**

(A) Correlation analysis of the transcription factor USF1 and HAS2-AS1; (B) Relative expression of USF1 glioma tumor and normal tissues.

**Supplement Figure 2 The full uncropped and unedited versions of Western blots**

**Supplement Table 1 Primer sequences for qRT-PCR**

| Genes    | Primer sequences                                                 |
|----------|------------------------------------------------------------------|
| HAS2-AS1 | F:5'-AGGGGTGGACTTCTTTGGAAC-3'<br>R:5'-CCAAACAGCTCCTTGTGCG-3'     |
| USF1     | F:5'-CACTAAACTCTGGGGCTTGTCC-3'<br>R:5'-CACCAGCCACTGCTAAACATCC-3' |
| GAPDH    | F:5'-GGAGCGAGATCCCTCCAAAAT-3'<br>R:5'-GGCTGTTGTCATACTTCTCATGG-3' |
